1 **Splicing-sensitive fusion transcripts associated with key tumor characteristics**  
2 **occur at high frequency in neuroblastoma**

3

4 Yao Shi<sup>1\*</sup>, Vilma Rraklli<sup>1</sup>, Eva Maxymovitz<sup>1</sup>, Shuijie Li<sup>2</sup>, Isabelle Westerlund<sup>1</sup>, Oscar Bedoya Reina<sup>2</sup>, Juan  
5 Yuan<sup>1</sup>, Petra Bullova<sup>2</sup>, C. Christofer Juhlin<sup>3</sup>, Adam Stenman<sup>3</sup>, Catharina Larsson<sup>3</sup>, Per Kogner<sup>4</sup>, Maureen  
6 J. O'Sullivan<sup>5,6</sup>, Susanne Schlisio<sup>2</sup> and Johan Holmberg<sup>1,\*</sup>

7

8 <sup>1</sup>Department of Cell and Molecular Biology, Karolinska Institutet, Solnavägen 9, SE-171 65 Stockholm,  
9 Sweden

10 <sup>2</sup>Department of Microbiology, Tumor- and Cellbiology, Karolinska Institutet, Solnavägen 9, SE-171 65  
11 Solna, Sweden

12 <sup>3</sup>Department of Oncology-Pathology, Karolinska Institutet, Cancer Center Karolinska (CCK), Karolinska  
13 University Hospital, Stockholm, Sweden

14 <sup>4</sup>Department of Women's and Children's Health, Karolinska Institutet, Karolinska University Hospital,  
15 SE-171 76 Stockholm, Sweden

16 <sup>5</sup>Department of Histopathology, Our Lady's Children's Hospital, Dublin, Ireland

17 <sup>6</sup>Trinity Translational Medicine Institute, Trinity College, Dublin, Ireland

18

19 \*Corresponding authors:

20 Yao Shi, ([yao.shi@ki.se](mailto:yao.shi@ki.se))

21 Johan Holmberg, ([johan.holmberg@ki.se](mailto:johan.holmberg@ki.se))

22

23

24

25

26

27

28 **Abstract**

29 **The paucity of recurrent mutations has hampered efforts to understand the pathogenesis of**  
30 **neuroblastoma. Through analysis of RNA-sequenced neuroblastoma, we identified >900 primarily**  
31 **intrachromosomal fusion transcripts generated by genes in close proximity. Fusions were enriched**  
32 **in chromosomal regions gained or lost in neuroblastoma and included well-known neuroblastoma**  
33 **oncogenes. The majority of fusions contained canonical splicing sites and a subset exhibited**  
34 **increased sensitivity to spliceosome inhibition. As a proof-of-principle that a gene product with**  
35 **altered properties can be produced by these fusions, we characterized the *ZNF451-BAG2* fusion**  
36 **which generates a truncated BAG2-protein capable of inhibiting retinoic acid-induced**  
37 **differentiation. Our findings elucidate a mechanism through which altered gene products, relevant**  
38 **for neuroblastoma pathogenesis and representing possible novel drug targets, can be generated.**

39

40 **Introduction**

41 Despite intense sequencing efforts few recurrently mutated genes have been identified in  
42 neuroblastoma (1, 2), resulting in a deficiency of drug targets. Instead, high-risk neuroblastoma is  
43 characterized by large-scale chromosomal rearrangements such as chromothripsis and loss or gain of  
44 chromosomal regions (e.g. loss of 1p36 and 11q or gain of 17q and 2p) with or without *MYCN*  
45 amplification (1, 3). Certain other types of tumors harbor and are driven by fusion proteins generated  
46 by chromosomal translocations (e.g. BCR-ABL in chronic myelogenous leukemia) (4). An additional  
47 mode, through which fusion transcripts can be generated, is represented by *cis*-splicing of adjacent  
48 genes (5, 6). Besides a fusion resulting from small interstitial genomic deletions at 11q generating  
49 either a *MLL-FOXR1* or a *PAFAH1B2-FOXR2* fusion (7) no intra-chromosomal chimeric transcripts have  
50 been described in neuroblastoma. However, they have been shown to be present in different tumor  
51 types as well as in non-transformed tissues and be promoted by different types of cellular stress such  
52 as infections or mutations (8-12). In order to explore whether neuroblastoma tumors harbor previously  
53 undetected gene fusions, we analyzed a cohort of 172 sequenced neuroblastoma tumors. We

54 identified an abundance of fusion transcripts, of which a significant proportion exhibited a distinct  
55 genomic distribution according to tumor risk. Identified fusions were predominantly generated by  
56 genes in close proximity and flanked by canonical splicing donors and acceptors. This pattern was  
57 distinct to fusions unique for neuroblastoma, whereas fusions we identified in normal adrenal gland  
58 or in other tumors did not exhibit such a pattern. Furthermore, a subset of identified NB specific fusions  
59 was hypersensitive to pharmacologic spliceosome inhibition in comparison to their wild type cognates.  
60 High expression levels of spliceosome factors were strongly associated with high-risk disease and  
61 spliceosome inhibition also promoted apoptosis in neuroblastoma cells. As a proof of principle, that  
62 fusions can generate novel gene products with alternative properties, we cloned and characterized the  
63 *ZNF451-BAG2* fusion. The generated protein exhibited distinct protein-protein binding properties  
64 compared to wild-type BAG2 and impeded retinoic acid induced differentiation. This reveals how a  
65 fusion gene product can influence neuroblastoma response to a drug commonly used in the treatment  
66 of high-risk patients (13).

## 67 **Results**

### 68 **Fusion transcripts are a common feature of neuroblastoma**

69 To reveal novel gene fusions in neuroblastoma we analyzed a data set (National Cancer Institute  
70 TARGET, dbGap Study Accession: phs000218.v16.p6) comprising 172 paired-end RNA sequenced  
71 neuroblastoma tumors (referred to as “NB172”), out of which 139 were diagnosed as high-risk, 19 as  
72 intermediate-risk and 14 as low-risk according to the Children’s Oncology Groups staging (COG),  
73 (Supplementary Table 1). We applied the fusion detection tool FusionCatcher (14) and identified  
74 chimeric transcripts in 163 out of 172 cases with an average of 31 distinct fusion transcripts per tumor  
75 (Supplementary Table 2). Short homologous sequences (SHS) have been suggested to serve as  
76 templates for reverse transcriptase dependent false positive chimeras/fusions (15). In order to avoid  
77 potential false positive fusions, we removed any fusion that contained genes with SHSs of five or more  
78 nucleotides, which reduced the number of identified fusions from 1073 to 924. The structural  
79 consequences of the fusions ranged from truncated proteins through bona fide fusion proteins to

80 deletion of genes. The majority of fusions (786/924) revealed by our analysis were intra-chromosomal  
81 fusion transcripts (Supplementary Table 2-3) many of which consisted of adjacent genes. Importantly,  
82 114 fusions occurred at a frequency of 5% or more (Top 25 in Fig. 1a, all >10% in Fig. 1b and full list in  
83 Supplementary Table 3) and all of these were intrachromosomal. There was a significant enrichment  
84 of fusion junctions at chromosomes 17 and 22 (Supplementary Fig. 1a). Furthermore, there was a  
85 significant enrichment of fusions that occurred in >10% of tumors at the same chromosomes (Fig. 1b).  
86 Gain of 17q is the most frequently occurring genomic alteration in high-risk neuroblastoma and a  
87 marker for adverse clinical outcome (3), whereas 22q alterations have been reported to be involved in  
88 the transition to metastatic and more aggressive neuroblastoma (16). We analyzed the fusion  
89 transcripts occurring exclusively in low/intermediate-risk and exclusively in high-risk tumors as well as  
90 fusion transcripts common to low/intermediate-risk and high-risk levels (Supplementary Table 4-5).  
91 Chimeric transcripts unique to low/intermediate-risk tumors exhibited significant enrichment at  
92 several chromosomal arms including 11q, a region commonly lost in high-risk neuroblastoma (Fig. 1c).  
93 In contrast, both common and high-risk unique fusion transcripts were enriched at 17q and 22q but  
94 not at 11q (Fig. 1c), with a pronounced increase in frequency of 17q fusion transcripts in high-risk  
95 tumors (Fig. 1c). Thus, with increased risk the frequency of 17q located fusion junctions also increases  
96 and was more than seven times higher than the average fusion rate per chromosomal arm. Several  
97 fusion transcripts encompassed factors involved in neuroblastoma pathogenesis, including *ARID1B*,  
98 *CASZ1*, *HDAC8*, *LMO1*, *MYCN*, *BRCA1*, *TERT* and *PDE6G* (Supplementary Table 6). Notably, tumors  
99 harboring fusion transcripts of well-known neuroblastoma oncogenes (e.g. *MYCN* and *LMO1*) also  
100 exhibited high expression levels of their wild-type cognates (Fig. 1 d-e). The high-risk susceptibility  
101 locus in *LMO1* is significantly associated with *MYCN*-non amplified high-risk neuroblastoma but not  
102 with *MYCN*-amplified high-risk neuroblastoma (17), interestingly the *LMO1-RIC3* fusion  
103 (Supplementary Fig. 1b) was exclusively detected in *MYCN*-non amplified high-risk neuroblastoma  
104 (Supplementary Table 6). The *BRCA1-VAT1* fusion was also only detected in *MYCN*-non amplified high-

105 risk cases; previously it has been shown that copy number amplification of *BRCA1* in NB is restricted to  
106 cases lacking MYCN-amplification (18) (Supplementary Table 6).

107

### 108 **Validation of fusion transcripts specific for neuroblastoma**

109 To corroborate the fusion transcripts observed in the NB172 dataset in an independent cohort, we  
110 performed paired-end RNA-sequencing in an additional cohort containing 14 neuroblastoma patient  
111 samples, together with eight neuroblastoma cell lines, NB-validation (NB-v, Supplementary table 7,  
112 Materials and Methods). We identified 139 fusions, of which 82 (~59%) were present in the NB172  
113 dataset (Fig. 2a and Supplementary Table 8). To investigate whether the identified fusions were  
114 neuroblastoma specific, we analyzed a cohort of 161 sequenced tissue samples from human normal  
115 adrenal glands (19). Out of 342 detected fusions in the adrenal gland cohort, only 23 (~6.7%) were  
116 present in the NB172 dataset and only 4 (~1.2%) of these were present in the NB-v cohort (Fig. 2a and  
117 Supplementary Table 9). This enrichment of common fusion transcripts in the neuroblastoma cohorts  
118 vs. the adrenal gland dataset was highly significant (chi-square test with Yate's correction, p-  
119 value<0.0001). Fusion transcript associated genes unique to and shared by the two neuroblastoma  
120 datasets were enriched at 17q and 2p, two chromosomal regions where gains are closely associated  
121 with high-risk neuroblastoma (Fig. 2b). Parametric analysis of gene set enrichment (PAGE) (20)  
122 comparing high-risk grade 4 tumors with low-risk grade 4s tumors (according to the International  
123 Neuroblastoma Staging System, INSS) in the R2 498-SEQC data base (21) showed that the NB172/NB-  
124 v common genes identified in Fig. 2a are enriched in the grade 4 high-risk tumors (Fig. 2c). To further  
125 investigate whether the identified fusions are distinct for neuroblastoma we analyzed a set of 65  
126 sequenced rhabdoid tumors (National Cancer Institute TARGET, dbGap Study Accession:  
127 phs000470.v17.p7) wherein 2055 unique fusion transcripts were detected. However, the overlap with  
128 the fusions detected in NB172 dataset was limited to 44 transcripts (~2.1%) (Fig. 2d). In a cohort of 177  
129 sequenced osteosarcoma tumors (National Cancer Institute TARGET, dbGap Study Accession:  
130 phs000468.v17.p7; Fig. 2d) we could detect 1650 unique fusion transcripts but there was no overlap

131 with the NB172 cohort (Fig. 2d). In contrast to fusions detected in neuroblastoma, the majority of  
132 detected fusions in rhabdoid tumors and osteosarcoma were inter-chromosomal (Supplementary Fig.  
133 2a). Detected fusions that occur at higher frequencies than 5% are more abundant in neuroblastoma  
134 (in 12.3% of tumors) than in rhabdoid tumor (5.7%) and osteosarcoma (0.4%) (Supplementary Fig. 2b).  
135 In osteosarcoma there was a considerable number of tumors (~24.9%, 44/177) harboring fusions  
136 predicting substantial deletion of the P53 tumor suppressor, disruption of the gene or a truncation at  
137 the C-terminal (Fig. 2e, Supplementary Table 10). Notably, *TP53* is one of the most frequently altered  
138 genes in osteosarcoma (22). As a comparison we could not detect any fusions containing *TP53* in the  
139 neuroblastoma tumors (0/172) (Fig. 2e).

140

141 For further validation, we designed primers spanning the fusion junctions of selected chimeric  
142 transcripts *VPS45-PLEKHO1*, *METTL23-MFSD11*, *HDAC8-CITED1*, *ZNF451-BAG2*, *TRIM3-HPX* and  
143 *PRR11-SMG8* (Supplementary Table 11). We proceeded to perform RT-PCR in 10 neuroblastoma tumor  
144 samples and in a panel consisting of cDNA from 14 untransformed human tissues. Our expression  
145 analysis revealed that all selected candidates, except *PRR11-SMG8*, were expressed in a  
146 neuroblastoma specific manner (Fig. 2f). For validation, PCR-products including four additional fusions,  
147 *TAF15-AC015849.2*, *FADS1-TMEM258*, *CHCHD10-VPREB3* and *LMO1-RIC3*, were excised, inserted into  
148 the pCR-Blunt II-TOPO vector and subsequently sequenced. All the sequenced PCR-products exhibited  
149 an identical sequence of nucleotides to that of the fusions identified by FusionCatcher (Fig. 2f and  
150 Supplementary Table 11-12). A previous report identified the *VPS45-PLEKHO1* fusion in non-  
151 transformed tissue (12), but it was not detected in our panel of non-transformed tissues.

152

### 153 **Transcriptional profile of *ZNF451-BAG2* positive neuroblastoma predicts poor clinical outcome and** 154 **high tumor risk**

155 One of the 25 most frequently occurring identified fusion transcripts encompassed the *BCL2 associated*  
156 *athanogene* (*BAG2*) which encodes a co-chaperone, *BAG2*, involved in targeting misfolded proteins for

157 degradation through an ubiquitin independent pathway (23). BAG2 levels have previously been shown  
158 to increase upon neuronal differentiation in neuroblastoma cells (24). In addition, BAG2 clears  
159 phosphorylated TAU from neuronal microtubule (23), potentially promoting stabilization of axons, an  
160 important feature of neuronal differentiation. We thus selected *ZNF451-BAG2* to investigate if the  
161 presence of a fusion transcript actually would generate a protein with altered functional properties.

162

163 To elucidate whether expression of the *ZNF451-BAG2* fusion correlates with altered expression levels  
164 of transcripts predicting clinical outcome we analyzed nine RNA-sequenced neuroblastoma tumors of  
165 the NB-v cohort that had been validated by RT-PCR (Fig. 2f). Tumors harboring the *ZNF451-BAG2* fusion  
166 (3/9 tumors, A13, A14 and A15) had significantly elevated expression of 32 genes and 34 genes with  
167 lower expression (Fig. 3a). To correlate these differentially expressed genes with clinical outcome we  
168 utilized a cohort of 498 sequenced neuroblastoma tumors (498-SEQC) available in the R2 database  
169 (21). The majority of genes with elevated expression was also enriched for in high-risk tumors whereas  
170 the opposite was the case for genes with lower expression (Fig. 3b). Consequently, several genes with  
171 elevated expression in *ZNF451-BAG2* neuroblastoma were strong indicators of shorter overall survival  
172 e.g. *ENOSF1* (exemplified in Fig. 3c). In contrast, genes that are strong predictors of longer overall  
173 survival showed decreased expression in *ZNF451-BAG2* expressing neuroblastoma cases (exemplified  
174 in Fig. 3d). In addition, k-means analysis revealed that a subset of *ZNF451-BAG2* associated transcripts  
175 clustered the 498-SEQC cohort into two groups (Fig. 3e). Group 1, with predominantly low expression  
176 levels, consists mainly of low-risk tumors, with low stages according to INSS and lack of *MYCN*  
177 amplification whereas the opposite is evident for group 2 wherein expression levels of *ZNF451-BAG2*  
178 associated transcripts are high (Fig. 3e). Consequently, patients with group 2 tumors have a  
179 significantly shorter overall survival (Fig. 3f). Gene set enrichment analysis (25) of transcriptional  
180 differences between *ZNF451-BAG2* expressing NB and those lacking *ZNF451-BAG2* expression showed  
181 a significant enrichment of cell cycle associated gene sets and a depletion of apoptosis related gene  
182 set (Fig. 3g-h).

183

184 **The *ZNF451-BAG2* fusion generates a truncated *BAG2* protein, present in a subset of neuroblastoma**  
185 **tumors**

186 The *ZNF451-BAG2* fusion spans the 3' UTR or exon 14 of *ZNF451* and the second exon of *BAG2*,  
187 potentially generating a truncated *BAG2* transcript lacking the first exon (Fig. 4a). Its first exon encodes  
188 part of a coiled-coil domain that is absent in the *ZNF451-BAG2* fusion (Fig. 4a). Full length *BAG2*  
189 encodes a 23.8 kDa protein, whereas the *ZNF451-BAG2* fusion transcript encodes a smaller 19.6 kDa  
190 protein ( $\Delta$ BAG2) (Fig. 4a). The *ZNF451-BAG2* chimera was present in 31 of the 172 sequenced tumors  
191 (18%). Alignment of wild-type *BAG2* protein (*BAG2*) across different species showed that in  $\Delta$ BAG2 the  
192 highly conserved N-terminal coiled-coil domain was truncated (Supplementary Fig. 3a), implying  
193 functional relevance of the truncated region for *BAG2*. To understand if tumors wherein *ZNF451-BAG2*  
194 was identified (Fig. 2f) also had detectable levels of  $\Delta$ BAG2 protein, we performed immunoblotting  
195 with an antibody targeting *BAG2*. All probed (n=13) tumors contained *BAG2* protein at varying levels  
196 however only five tumors also co-expressed detectable levels of  $\Delta$ BAG2, while no detectable levels of  
197  $\Delta$ BAG2 were observed in tissue from six human normal adrenal glands (Fig. 4b and Supplementary Fig.  
198 3b).

199

200  **$\Delta$ BAG2 impairs clearance of phosphorylated TAU and binding to HSC70**

201 *BAG2* has been shown to be important for clearance of phosphorylated forms of the TAU protein  
202 (pTAU) and thus been implicated as a stabilizer of microtubules (23). To test if this capacity was  
203 attenuated by the presence of  $\Delta$ BAG2 we probed the levels of pTAU in a panel of neuroblastoma  
204 tumors and normal adrenal glands. This showed a clear association between the presence of pTAU and  
205 endogenous  $\Delta$ BAG2 (Fig. 4b and Supplementary Fig. 3b). To validate that this was caused by  $\Delta$ BAG2  
206 protein expression, we cloned and validated the  $\Delta$ BAG2 transcript where after we expressed it and  
207 *BAG2* alone or in combination in SK-N-FI neuroblastoma cells. Upon *BAG2* overexpression, the levels  
208 of pTAU were significantly reduced whereas total TAU was present in amounts similar to those in



209 control-transduced cells (Fig. 4c).  $\Delta$ BAG2 overexpressing cells retained pTAU levels and more  
210 importantly, upon co-expression BAG2 failed to clear pTAU (Fig. 4Cc), implying that  $\Delta$ BAG2 can act as  
211 a negative regulator of BAG2 function. BAG2 has been shown to bind the heat shock cognate 70  
212 (HSC70) (26), a chaperone protein important for pTAU ubiquitination (27) and axon outgrowth (28).  
213 Overexpression of BAG2 and  $\Delta$ BAG2 in SK-N-FI neuroblastoma cells followed by BAG2  
214 immunoprecipitation via FLAG revealed that BAG2 but not  $\Delta$ BAG2 binds a 70 kDa protein  
215 (Supplementary Fig. 3c). Since BAG2 has been reported to bind HSC70 (26), we performed additional  
216 immunoprecipitation followed by immunoblotting with a HSC70 specific antibody. This revealed that  
217 BAG2 binds HSC70, whereas  $\Delta$ BAG2 does not (Fig. 4d).

218

#### 219 **$\Delta$ BAG2 impedes differentiation of neuroblastoma in response to retinoic acid**

220 To investigate whether  $\Delta$ BAG2 impinges on the capacity of neuroblastoma cells to differentiate, we  
221 treated CTRL (empty vector), BAG2 or  $\Delta$ BAG2 expressing SK-N-FI cells (Fig. 4E) with retinoic acid (RA),  
222 a compound used in adjuvant therapy of high-risk neuroblastoma patients (13). After six days of RA  
223 treatment, cells transduced with either CTRL (Fig. 4f-g, I) or BAG2 (Fig. 4h-i, I) acquired neuronal  
224 morphology with long neurites. In contrast,  $\Delta$ BAG2 transduced cells exhibited a weaker response to  
225 RA, with significantly less neurite formation (Fig. 4j-l). To validate this effect we transduced SK-N-BE(1)  
226 neuroblastoma cells with a doxycycline-inducible version of the  $\Delta$ BAG2 fusion genes (Fig. 4m). Upon  
227 doxycycline induction,  $\Delta$ BAG2 expressing cells exhibited a reduced capacity to respond to RA (Fig. 4n-  
228 r).

229

#### 230 **Alternative splicing affects the generation of neuroblastoma specific fusions**

231 Previously it has been suggested that *cis*-splicing between adjacent genes can generate fusion  
232 transcripts in prostate cancer (5, 6). To elucidate whether there was a correlation between distance  
233 and frequency we plotted the distance between 5' and 3' of the fusion junction in the  
234 intrachromosomal fusion transcript versus the fusion frequency in the NB172 and NB-v data sets (Fig.

235 5a). Fusions occurring at high frequency in both data sets were enriched between 1 to 100kb, whereas  
236 transcripts separated by more than 100kb occurred at lower frequencies and almost exclusively in the  
237 larger NB172 data set (Fig. 5a). The spatial proximity of identified transcripts suggests that these  
238 fusions are the result of *cis*-splicing (5, 8). Inspection of nucleotide sequences located at 5' and 3' of  
239 the fusion junctions for canonical splicing donors (GT) and acceptors (AG) revealed that 81.9% carried  
240 GT and AG at the 5' and 3' fusion sites (GT\*AG) (Fig. 5b). Notably, 87% of intra-chromosomal fusions  
241 had GT\*AG at the fusion junction whereas only 45.9% of inter-chromosomal fusions contained  
242 canonical splice sites at the junctions. This pattern was unique to neuroblastoma as fusions detected  
243 in normal adrenal gland, osteosarcoma and rhabdoid tumor exhibited no enrichment of splice sites  
244 (Fig. 5b). Aberrant RNA splicing has been suggested as a driving event for several cancers and  
245 mutations in genes coding for components of the spliceosome have been identified in several tumors  
246 (29). Furthermore in breast cancer, it has been shown that an intact spliceosome is required to tolerate  
247 oncogenic MYC hyperactivation (30). We compared expression levels of genes of the KEGG,  
248 "Spliceosome" gene category between neuroblastoma and normal adrenal gland. Out of 134 genes 46  
249 had significantly higher expression levels in the neuroblastoma, whereas only three had lower levels  
250 of expression (Fig. 5c). To further elucidate whether there were clinically relevant differences in  
251 expression of spliceosome genes between low- and high-risk neuroblastoma we performed k-means  
252 analysis of the 498-SEQC neuroblastoma cohort. Together with previous observations (31) our analysis  
253 elucidates how the differential expression of spliceosome factors clearly identifies tumors of different  
254 clinical outcome, with high expression levels of splicing factors predicting high-risk tumors with bleak  
255 clinical outcome and substantially shorter overall survival (Fig. 6d-e). Furthermore, previous genome  
256 sequencing studies of neuroblastoma patients revealed mutations in several spliceosome factors in  
257 primary tumors and *de novo* mutations in spliceosome factors occurred in relapsed tumors (1, 2, 32,  
258 33) (summarized in Supplementary Table 13). To investigate whether inhibition of spliceosome activity  
259 would selectively impede the generation of fusion transcripts but not their wild type cognates, we  
260 treated neuroblastoma cells (LAN-1 and SK-N-BE(1)) with the spliceosome inhibitor pladienolide B (34).

261 Upon treatment, there was a loss of expression for a majority of selected high frequency fusion  
262 transcripts whereas expression of most wild type genes constituting the fusions were unaffected at  
263 these concentrations (Fig 6a-b and Supplementary Fig. S4). To elucidate if selective loss of fusion  
264 transcripts upon spliceosome inhibition was associated with increased apoptosis we treated the  
265 neuroblastoma cell lines LAN-1 and SK-N-BE(1) with increasing concentrations of pladienolide B. As  
266 controls we utilized non-transformed human diploid fibroblasts (HNDF). Already at 5nM the  
267 neuroblastoma cell lines exhibited increased levels of cleaved caspase-3 and cleaved PARP, whereas  
268 control cells showed no signs of cell death. At 20nM cell death in both neuroblastoma cell lines was  
269 further increased but control cells were still non-responsive (Fig. 6c).

270

## 271 **Discussion**

272 Our study shows that a high frequency of neuroblastoma specific fusion transcripts could constitute  
273 an overlooked process through which altered transcripts are generated. It has been shown that upon  
274 cellular stress (e.g. viral infection, replicative or osmotic stress and mutational events) transcriptional  
275 termination can be blocked, increasing the probability of generating “downstream of genes”-  
276 transcripts (11). Thus, a proportion of fusions could represent passengers that occur as a response to  
277 cellular stress combined with neuroblastoma associated events such as gain or loss of chromosomal  
278 regions (e.g. 17q and 2p). In contrast to such passengers, certain fusions could be early events actually  
279 preceding and promoting other transformative events. Pharmacologic inhibition of splicing selectively  
280 repressed expression of several top frequent fusion transcripts but not of their wild-type cognates and  
281 there was a high frequency of splicing donor/acceptor sites in neuroblastoma specific fusions but not  
282 in fusions detected in normal adrenal gland, osteosarcoma or rhabdoid tumors. This pattern implies  
283 that a substantial proportion of the detected fusions are of the same *cis*-splicing type as previously  
284 reported in prostate cancer (5). Our analysis reveals that high expression levels of splicing associated  
285 factors is a distinguishing feature of high-risk neuroblastoma, representing a strong predictor of tumor  
286 grade. Regardless of the mechanisms underlying the generation of these fusions, they are not

287 necessarily dependent on amino acid changing mutations but can still provide a source of modified  
288 gene products with the potential to promote neuroblastoma but also reveal novel drug targets. Given  
289 the low frequency of recurrent mutations in neuroblastoma, such a pool of altered gene products could  
290 indeed be relevant for tumor pathophysiology. A background of expressed fusion transcripts  
291 potentially augments the effect of oncogenic drivers. Interestingly, our analysis shows that when  
292 established drivers of neuroblastoma (e.g. *MYCN* and *LMO1*) are part of the fusion transcripts the  
293 expression levels of wild type cognates are elevated. In addition, a panel of neuroblastoma specific  
294 fusions occurring at high frequency could serve as biomarkers for diagnosis and the presence of risk  
295 specific fusions could sub-divide neuroblastoma patients for precision therapy. Hence, fusions that are  
296 passenger events rather than oncogenic drivers can still be of clinical relevance. One concern with  
297 previously reported fusions is the relatively few cases that have been independently validated. In 2015,  
298 only 3% of fusions identified by deep sequencing could be reproducibly detected (4). Arguably, the  
299 “non-genomic” characteristic of this type of intrachromosomal fusions potentially augments the  
300 detection of false positives. The risk that a proportion of fusion transcripts constitute false positives as  
301 the result of spurious transcription or of sequencing errors is reduced by our crosswise analysis with  
302 other tumors and healthy tissues. There is a clear enrichment of common fusions unique for the  
303 neuroblastoma data sets that do not appear in any of the other tumors nor in normal adrenal glands.  
304 It should however be noted that the normal adrenal gland is not perfect as control tissue due to the  
305 cellular heterogeneity of the organ. Nevertheless, neuroblastoma specific fusions are enriched for  
306 genes located at chromosomal regions (2p or 17q) which are commonly gained in high-risk  
307 neuroblastoma. The selective loss of several fusion transcripts upon spliceosome inhibition is an  
308 additional strong indication that fusion transcripts indeed are present. Our validation of ten fusions  
309 through PCR and subsequent sequencing further underscores that these fusions can generate  
310 alternative gene products. Interestingly, tumor specific distribution of fusions is reflected in the  
311 osteosarcoma tumors where the *TP53* tumor suppressor is a fusion partner in an disproportional  
312 amount of the detected fusions, mirroring the importance of inactivating mutations in *TP53* for this

313 disease (22). It has previously been reported that the presence of short homology sequences (SHS)  
314 can generate false RNA-chimeras due to template switching during the reverse transcriptase reaction  
315 (35). Such a mechanism would presumably generate random fusions between transcripts containing  
316 matching SHSs with no preference for any particular chromosomal location nor any preference for  
317 intrachromosomal vs interchromosomal fusion transcripts. The non-random enrichment of fusions at  
318 chromosomal locations that mirror the disease as well as the enrichment of intrachromosomal fusions  
319 between closely located genes suggests that reverse transcriptase induced template switching is not  
320 the cause of these fusions. Furthermore, it is plausible that fusions detected due to random template  
321 switching should correlate with high expression levels, which we do not detect. Our study shows that  
322 an altered protein with novel properties can be generated as a consequence of an intrachromosomal,  
323 splicing dependent fusion and that this altered protein influences the response to a drug (RA)  
324 commonly used to treat high-risk neuroblastoma patients. However, to fully evaluate the importance  
325 of identified fusions further functional experiments are required. A previous study indeed shows how  
326 the *SLC45A3-ELK4* read-through fusion transcript is elevated in prostate cancer tissue, is androgen-  
327 regulated and can be detected in a non-invasive assay from biopsies of men at risk of having prostate  
328 cancer (9). Even though it is possible that a portion of individual fusions are passenger events rather  
329 than oncogenic drivers a continued effort is justified to understand the regulation of fusions and  
330 downstream consequences of fusions in neuroblastoma as well as in other tumors.

331

332

### 333 **Materials and Methods**

334 **Human tissue Samples.** Neuroblastoma primary tumors came either from the Swedish NB Registry  
335 (ethical permission (DN03-736) granted by Karolinska Institutets Forskningsetikommitté Nord, (clinical  
336 information described in Li et. al. (36), or from the Irish NB cohort (described in Supplementary table  
337 7), with ethical approval of the Medical and Research Ethics Committee of Our Lady's Children's

338 Hospital, Crumlin, Dublin, Ireland. Informed consent from families of subjects was obtained for  
339 samples. Six histologically confirmed normal human adrenal glands were included as controls (covered  
340 by existing ethical approvals; Dnr 01-136 and Dnr 01-353 KI forskningsetikkommitté Nord). Human  
341 total RNA from different normal tissues from Clontech (Human Total RNA Master Panel II, Cat#.  
342 636643).

343

344 **Paired-end RNA-Seq.** RNA was isolated using the PerfectPure RNA Cultured Cell Kit (cell lines) and  
345 PerfectPure RNA Tissue Kit (patient samples) from 5 PRIME. RNA-seq libraries were prepared using  
346 TruSeq RNA Library Preparation Kit v2 (Illumina); paired-end RNA sequencing (125 bp) were performed  
347 in SciLifeLab (Stockholm).

348

349 **Data Analysis.** FusionCatcher (14) was applied to detect the fusion transcripts in paired-end RNA-seq  
350 data. Reads were mapped to hg19 and differential expression analysis was performed as described  
351 in(37). For enrichment analysis in Figure 1c, only fusions occurring above ~3% in each risk group were  
352 included (1 case in Low/Intermediate-risk, 4 cases in High-risk and 5 cases for the common fusion  
353 transcripts shared by Low/Intermediate-risk and high-risk groups).

354

355 **Cloning and expression of wildtype *BAG2* and *ZNF451-BAG2*.** cDNA was synthesized from total RNA  
356 by the iScript cDNA Synthesis Kit (Bio-Rad). Coding regions of wildtype *BAG2* and *ZNF451-BAG2* were  
357 amplified from SK-N-AS cells for subcloning into p3XFLAG-CMV14 (Sigma) and pLVX-EF1 $\alpha$ -IRES-  
358 mCherry (Clontech) using primer pair 1 and 2 respectively (Supplementary Table 11), inserted to pCR-  
359 Blunt II-TOPO vector via zero Blunt TOPO PCR Cloning Kit (ThermoFisher Scientific) and sequenced.  
360 *BAG2* and *ZNF451-BAG2* were subcloned into p3XFLAG-CMV14 vector using *EcoRI* and *BamHI* and  
361 pLVX-EF1 $\alpha$ -IRES-mCherry lentiviral vector using *EcoRI* and *BamHI*. To generate pLVX-Tetone-puro-

362 IRES-mCherry-empty/BAG2/ZNF451-BAG2 vectors, pLVX-Tetone-puro-empty (Clontech) construct was  
363 linearized with *AgeI*, blunted and digested with *EcoRI*; pLVX-EF1 $\alpha$ -IRES-mCherry-  
364 empty/BAG2/ZNF451-BAG2 vectors were linearized with *MluI*, blunted and digested with *EcoRI* to  
365 release IRES-mCherry-empty/BAG2/ZNF451-BAG2; then linearized and blunted pLVX-Tetone-puro-  
366 empty construct was ligated with fragment of IRES-mCherry-empty/BAG2/ZNF451-BAG2 separately.

367 Lentiviruses expressing pLVX-EF1 $\alpha$ -IRES-mCherry-empty/BAG2/ZNF451-BAG2 and pLVX-Tetone-puro-  
368 IRES-mCherry-empty/BAG2/ZNF451-BAG2 were produced in 293FT cells using lipofectamine 2000  
369 based protocol.

370

371 **Cell culture.** All neuroblastoma cell lines (SH-SY5Y, SK-N-SH, SK-N-FI, SK-N-BE(1), SK-N-AS, LAN-1, CHP-  
372 212 and IMR-5) were maintained in RPMI1640 medium supplemented with 10% FBS, 1%  
373 penicillin/streptomycin and 1% L-glutamine and grown in 5%CO<sub>2</sub> at 37°C.

374

375 **Differentiation assay and immunofluorescence staining.** For short-term RA induced differentiation  
376 assay, SK-N-FI cells were seeded in 6 well plates; after 24 hours, cells were infected by lentiviruses  
377 expressing pLVX-EF1 $\alpha$ -IRES-mCherry-empty/BAG2/ZNF451-BAG2 for 48 hours; then cells were  
378 trypsinized and 20,000 cells were reseeded into 6 well plates with coverslips; 24h later, cells were  
379 treated with 1  $\mu$ M retinoic acid (RA) or DMSO as control for 6 days. For doxycycline-inducible system,  
380 20,000 SK-N-BE(1) cells with stable overexpression of pLVX-Tetone-puro-IRES-mCherry-ZNF451-BAG2  
381 were seeded in 6 well plates with coverslips, and after 24h, cells were pre-treated with 1  $\mu$ M  
382 doxycycline or DMSO as a control for one day; then cells received one of the following 4 different  
383 treatment for 4 days: DMSO, 1  $\mu$ M RA, 1  $\mu$ M doxycycline or 1  $\mu$ M RA+1  $\mu$ M doxycycline.

384 Cells on coverslips were fixed in RPMI1640 medium containing 2% PFA for 5 minutes at room  
385 temperature (RT), washed once with PBS at RT, fixed with 4% PFA for another 15 minutes at RT and

386 washed twice with cold PBS; then cells were permeabilized with PBS containing 0.25% Triton X-100 for  
387 15 minutes at RT and blocked with 3% BSA for 1h at RT. Immunofluorescent stainings were performed  
388 with the following primary antibody Tuj1 (Covance, 1:1000) overnight at +4 °C.

389

390 **Quantification.** Cells were stained as in Fig. 4g-l and o-r. Images were taken by confocal microscopy  
391 (10X). For quantification, images were coded and a researcher who had not participated in staining  
392 and image acquisition manually counted the ratio of transduced cells extending TUJ1<sup>+</sup> neurites/total  
393 number of transduced cells/microscopic field. For DOX<sup>-</sup> SK-N-BE(1) the ratio of cells extending TUJ1<sup>+</sup>  
394 neurites/total number of cells/microscopic field were counted. Microscopic fields containing less than  
395 three transduced cells were discarded. Grubb's test was performed for outlier detection (alpha  
396 p<0.05). For statistical analysis in Fig. 4l and r one-way ANOVA followed by a Tukey's multiple  
397 comparison test was performed.

398

399 **Western blotting.** Immunoblotting was performed using standard protocols. Following primary  
400 antibodies were used: BAG2(sc-390262, 1:200), phospho-ser396-Tau(sc-101815, 1:1000), HSC70(sc-  
401 7298, 1:200) from Santa Cruz; phospho-ser404-Tau(44-758G, 1:200) from ThermoFisher Scientific;  
402 total Tau(A0024, 1:1000) from Dako; beta-actin(AC-15, 1:3000), FLAG(F1804, 1:1000) from Sigma;  
403 PARP (9542s), Caspase-3 (14220s) and cleaved caspase-3 (9664s) from Cell Signaling.

404

405 **Co-immunoprecipitation.** SK-N-FI cells were seeded in 15 cm dishes 24 hours before transfection.  
406 Transfection of p3XFLAG-CMV14-empty/BAG2/ZNF451-BAG2 constructs was performed using  
407 lipofectamine 2000. 48 hours post-transfection, cells were harvested and proteins were extracted  
408 using lysis buffer containing 10 mM TRIS-HCl (pH7.4), 150 mM NaCl, 0.5% NP40, complete protease  
409 and phosphatase inhibitors (Roche). FLAG-tagged fusion proteins were immunoprecipitated using



410 Anti-FLAG M2 magnetic beads (Sigma) according to manufacturer's instructions. Bound proteins were  
411 examined by silver staining or Western blotting using standard protocols.

412

413 **Acknowledgements:** We thank members of the Holmberg and Schlisio groups for valuable comments.

414 **Funding:** The Johan Holmberg lab is supported by the Swedish Children Cancer Foundation, the  
415 Swedish Cancer foundation, Knut and Alice Wallenberg Foundation, Swedish Research Council (VR),  
416 The Strategic Research Programme in Cancer (StratCan, SFO) and The Swedish Brain Foundation.

417 **Author contributions:** Y.S. and J.H. designed the study. Y.S. performed the majority of the experiments  
418 with help from V.R., E.M., S.L., P.B., J.Y., and I.W. Y.S. generated the libraries for RNA-sequencing. Y.S.  
419 and J.H performed the analysis with help from O.B.R. C.C.J, A.S., C.L., P.K. and M.J.S supplied the clinical  
420 material. Y.S. and J.H. wrote the manuscript with input from all authors. **Data and materials**  
421 **availability:** Data needed to evaluate the conclusions in the paper are present in the paper and/or the  
422 Supplementary Materials. Raw and processed NGS data will be deposited in the GEO database.

423 **Declaration of interests**

424 The authors declare no competing interests.

425

426 **References**

- 427 1. Pugh TJ, *et al.* (2013) The genetic landscape of high-risk neuroblastoma. *Nat Genet* 45(3):279-  
428 284.
- 429 2. Molenaar JJ, *et al.* (2012) Sequencing of neuroblastoma identifies chromothripsis and defects  
430 in neuritogenesis genes. *Nature* 483(7391):589-593.
- 431 3. Brodeur GM (2003) Neuroblastoma: biological insights into a clinical enigma. *Nat Rev Cancer*  
432 3(3):203-216.
- 433 4. Mertens F, Johansson B, Fioretos T, & Mitelman F (2015) The emerging complexity of gene  
434 fusions in cancer. *Nat Rev Cancer* 15(6):371-381.
- 435 5. Qin F, *et al.* (2015) Discovery of CTCF-sensitive Cis-spliced fusion RNAs between adjacent  
436 genes in human prostate cells. *PLoS Genet* 11(2):e1005001.
- 437 6. Zhang Y, *et al.* (2012) Chimeric transcript generated by cis-splicing of adjacent genes  
438 regulates prostate cancer cell proliferation. *Cancer discovery* 2(7):598-607.

- 439 7. Santo EE, *et al.* (2012) Oncogenic activation of FOXR1 by 11q23 intrachromosomal deletion-  
440 fusions in neuroblastoma. *Oncogene* 31(12):1571-1581.
- 441 8. Jia Y, Xie Z, & Li H (2016) Intergenically Spliced Chimeric RNAs in Cancer. *Trends Cancer*  
442 2(9):475-484.
- 443 9. Rickman DS, *et al.* (2009) SLC45A3-ELK4 is a novel and frequent erythroblast transformation-  
444 specific fusion transcript in prostate cancer. *Cancer Res* 69(7):2734-2738.
- 445 10. Maher CA, *et al.* (2009) Transcriptome sequencing to detect gene fusions in cancer. *Nature*  
446 458(7234):97-101.
- 447 11. Proudfoot NJ (2016) Transcriptional termination in mammals: Stopping the RNA polymerase  
448 II juggernaut. *Science* 352(6291):aad9926.
- 449 12. Babiceanu M, *et al.* (2016) Recurrent chimeric fusion RNAs in non-cancer tissues and cells.  
450 *Nucleic Acids Res* 44(6):2859-2872.
- 451 13. Matthay KK, *et al.* (2009) Long-term results for children with high-risk neuroblastoma treated  
452 on a randomized trial of myeloablative therapy followed by 13-cis-retinoic acid: a children's  
453 oncology group study. *J Clin Oncol* 27(7):1007-1013.
- 454 14. D. Nicorici MS, H. Edgren, S. Kangaspeska, A. Murumagi, O. Kallioniemi, S. Virtanen, O. Kilku,  
455 (2014) FusionCatcher – a tool for finding somatic fusion genes in paired-end RNA-sequencing  
456 data. *bioRxiv*.
- 457 15. Xie B, *et al.* (2016) Two RNAs or DNAs May Artificially Fuse Together at a Short Homologous  
458 Sequence (SHS) during Reverse Transcription or Polymerase Chain Reactions, and Thus  
459 Reporting an SHS-Containing Chimeric RNA Requires Extra Caution. *PLoS One*  
460 11(5):e0154855.
- 461 16. Khan FH, *et al.* (2015) Acquired genetic alterations in tumor cells dictate the development of  
462 high-risk neuroblastoma and clinical outcomes. *BMC Cancer* 15:514.
- 463 17. Hungate EA, *et al.* (2017) Evaluation of Genetic Predisposition for MYCN-Amplified  
464 Neuroblastoma. *J Natl Cancer Inst* 109(10).
- 465 18. Lee SH, *et al.* (2017) ARID1B alterations identify aggressive tumors in neuroblastoma.  
466 *Oncotarget* 8(28):45943-45950.
- 467 19. Consortium GT (2013) The Genotype-Tissue Expression (GTEx) project. *Nat Genet* 45(6):580-  
468 585.
- 469 20. Kim SY & Volsky DJ (2005) PAGE: parametric analysis of gene set enrichment. *BMC*  
470 *Bioinformatics* 6:144.
- 471 21. Koster J (2008) 'R2: Genomics Analysis and Visualization Platform (<http://r2.amc.nl>)'.
- 472 22. Martin JW, Squire JA, & Zielenska M (2012) The genetics of osteosarcoma. *Sarcoma*  
473 2012:627254.
- 474 23. Carrettiero DC, Hernandez I, Neveu P, Papagiannakopoulos T, & Kosik KS (2009) The  
475 Cochaperone BAG2 Sweeps Paired Helical Filament-Insoluble Tau from the Microtubule.  
476 *Journal of Neuroscience* 29(7):2151-2161.
- 477 24. Santiago FE, Almeida MC, & Carrettiero DC (2015) BAG2 Is Repressed by NF-kappaB Signaling,  
478 and Its Overexpression Is Sufficient to Shift Abeta1-42 from Neurotrophic to Neurotoxic in  
479 Undifferentiated SH-SY5Y Neuroblastoma. *Journal of molecular neuroscience : MN* 57(1):83-  
480 89.
- 481 25. Subramanian A, *et al.* (2005) Gene set enrichment analysis: a knowledge-based approach for  
482 interpreting genome-wide expression profiles. *Proc Natl Acad Sci U S A* 102(43):15545-15550.
- 483 26. Qin L, Guo J, Zheng Q, & Zhang H (2016) BAG2 structure, function and involvement in  
484 disease. *Cellular & molecular biology letters* 21:18.
- 485 27. Shimura H, Schwartz D, Gygi SP, & Kosik KS (2004) CHIP-Hsc70 complex ubiquitinates  
486 phosphorylated tau and enhances cell survival. *J Biol Chem* 279(6):4869-4876.
- 487 28. DeGeer J, *et al.* (2015) Hsc70 chaperone activity underlies Trio GEF function in axon growth  
488 and guidance induced by netrin-1. *J Cell Biol* 210(5):817-832.
- 489 29. Wang BD & Lee NH (2018) Aberrant RNA Splicing in Cancer and Drug Resistance. *Cancers*  
490 (*Basel*) 10(11).

- 491 30. Hsu TY, *et al.* (2015) The spliceosome is a therapeutic vulnerability in MYC-driven cancer.  
492 *Nature* 525(7569):384-388.
- 493 31. Laetsch TW, *et al.* (2014) Multiple components of the spliceosome regulate Mcl1 activity in  
494 neuroblastoma. *Cell Death Dis* 5:e1072.
- 495 32. Eleveld TF, *et al.* (2015) Relapsed neuroblastomas show frequent RAS-MAPK pathway  
496 mutations. *Nat Genet* 47(8):864-871.
- 497 33. Sausen M, *et al.* (2013) Integrated genomic analyses identify ARID1A and ARID1B alterations  
498 in the childhood cancer neuroblastoma. *Nat Genet* 45(1):12-17.
- 499 34. Mizui Y, *et al.* (2004) Pladienolides, new substances from culture of *Streptomyces platensis*  
500 Mer-11107. III. In vitro and in vivo antitumor activities. *J Antibiot (Tokyo)* 57(3):188-196.
- 501 35. Akiva P, *et al.* (2006) Transcription-mediated gene fusion in the human genome. *Genome Res*  
502 16(1):30-36.
- 503 36. Li S, *et al.* (2016) The 1p36 Tumor Suppressor KIF 1Bbeta Is Required for Calcineurin  
504 Activation, Controlling Mitochondrial Fission and Apoptosis. *Dev Cell* 36(2):164-178.
- 505 37. Westerlund I, *et al.* (2017) Combined epigenetic and differentiation-based treatment inhibits  
506 neuroblastoma tumor growth and links HIF2alpha to tumor suppression. *Proc Natl Acad Sci U*  
507 *S A* 114(30):E6137-E6146.

508

509

## 510 **Figure legends**

### 511 **Figure 1. Identification of fusion transcripts in neuroblastoma tumors.**

512 (a) Identification of the 25 most frequent fusions by FusionCatcher in a cohort of 172 paired end RNA  
513 sequenced neuroblastoma patient samples derived from the NCI TARGET project (NB172).

514 (b) Circos plot of genomic distribution of top frequent fusions (> 10%) in NB172.

515 (c) Enrichment of fusion transcripts common or unique to low/intermediate-risk or high-risk tumors in  
516 chromosomal arms as calculated by a normalized enrichment score = (counts of fusion transcripts in  
517 each chromosomal arm / length of chromosomal arm (Mb)) / average enrichment.

518 (d-e) *MYCN/LMO1* expression levels are high in neuroblastoma tumors (red) bearing fusion transcripts  
519 of which one fusion partner is either *MYCN* or *LMO1*, as shown by expression value FPKM (Fragments  
520 Per Kilobase per Million mapped reads).

521 P-values in (b-c) were calculated from Z-values, assuming standard normal distribution. \*p<0.05,  
522 \*\*p<0.01, \*\*\*p<0.001.

523

### 524 **Figure 2. Validation of fusion transcripts.**

525 (a) Venn diagram of identified fusions in three datasets, NB172 (NCI TARGET), Validation-NB (NB-v, 14  
526 neuroblastoma patients plus 8 neuroblastoma cell lines) and adrenal gland (161 samples from normal  
527 human adrenal gland).

528 (b) Enrichment of fusion transcript genes unique to the NB172 and the NB-v cohorts on chromosomal  
529 arms 2p and 17q.

530 (c) Parametric analysis of gene set enrichment (PAGE) of the 498-SEQC neuroblastoma dataset show  
531 an enrichment of NB172 and NB-v unique common fusions in high-risk grade 4 tumors compared to  
532 low-risk 4S tumors.

533 (d) Venn diagram of identified fusions in three datasets, NB172 (NCI TARGET), Rhabdoid (65 Rhabdoid  
534 tumor patient samples) and Osteosarcoma (177 Osteosarcoma patient samples).

535 (e) Comparison of the number of neuroblastoma (NB) and osteosarcoma (OS) tumors with at least one  
536 fusion transcript containing *TP53*.

537 (f) Validation of fusion transcripts by RT-PCR and sequencing in Validation-NB neuroblastoma patients,  
538 indicated normal tissues were used as controls; DRG, human dorsal root ganglion.

539 P-values in (a and b) were calculated by chi-square test with Yate's correction.

540

541 **Figure 3. Differentially expressed genes in *ZNF458-BAG2* containing neuroblastoma predicts clinical  
542 outcome and tumor risk.**

543 (a) Number of differentially expressed genes (DEGs) in RT-PCR validated neuroblastoma samples with  
544 or without *ZNF451-BAG2* fusion as shown in Fig. 2e.

545 (b) Distribution of DEGs from (a) in 498 sequenced neuroblastoma (498-SEQC) according to high-risk  
546 vs low-risk disease. Red dots designate genes up in (a) and green dots designates genes down in (a).  
547 The two most significant genes in high-risk (*ENOSF1*) vs low-risk (*RAMP3*) disease are indicated.

548 (c) Overall survival probability according to *ENOSF1* expression.

549 (d) Overall survival probability according to *RAMP3* expression.

550 (e) K-means analysis of the 498-SEQC dataset, utilizing the DEGs in tumors harboring the *ZNF451-BAG2*  
551 fusion (a), generates two clusters with significant differences in Risk, INSS and *MYCN* amplification.

552 (f) Overall survival probability of the two clusters identified in (e).

553 (g-h) Gene set enrichment analysis (GSEA) showing enrichment of genes in the cell cycle associated  
554 gene set "HALLMARK\_G2M\_CHECKPOINT" (g) and depletion of genes in the "HALLMARK\_APOPTOSIS"  
555 gene set in  $\Delta$ BAG2 containing neuroblastoma.

556

557 **Figure 4.  $\Delta$ BAG2 impairs the clearance of phosphorylated TAU and binding to HSC70 and inhibits  
558 retinoic acid (RA) induced differentiation in neuroblastoma cells.**

559 (a) Schematic representation of *ZNF451-BAG2* fusion, the resulting truncated BAG2 is referred to as  
560  $\Delta$ BAG2.

561 (b) Endogenous tumor  $\Delta$ BAG2 protein expression is associated with high levels of phosphorylated TAU  
562 (p-TAU) in neuroblastoma tumors as detected by immunoblotting.

563 (c) SKNFI cells were transfected with p3XFLAG-CMV14-empty/*BAG2*/ $\Delta$ *BAG2*/*BAG2*+ $\Delta$ *BAG2* for 48  
564 hours. Cells were harvested and proteins were extracted; whole-cell lysates were used to detect *BAG2*,  
565 FLAG, p-TAU on Ser404, total TAU and ACTIN.

566 (d) FLAG-tagged proteins were immunoprecipitated from whole-cell lysates as prepared in (c) using  
567 Anti-FLAG M2 magnetic beads and eluted. Immunoprecipitated proteins were western blotting to  
568 detect HSC70, *BAG2*.

569 (e-l) Constitutive lentiviral overexpression of  $\Delta$ *BAG2*, but not wildtype *BAG2* (backbone pLVX-EF1 $\alpha$ -  
570 IRES-mCherry) inhibited RA-induced differentiation (6 days of treatment) in SK-N-FI cells.

571 (m-r) Doxycycline inducible lentiviral overexpression of  $\Delta$ *BAG2* (backbone pLVX-Tet-one-puro-IRES-  
572 mCherry) inhibited RA-induced differentiation (4 days of treatment) in SK-N-BE(1) cells. Protein levels  
573 of *BAG2* and  $\Delta$ *BAG2* were analyzed by Western blotting (e and m). Immunostaining was performed  
574 using antibody against neuronal marker  $\beta$ 3-tubulin (TUJ1).

575 Data in l and r is represented as mean of transduced cells with TUJ1<sup>+</sup> neurites/total number of  
576 transduced cells +/- SEM, each data-point represents this ratio in a single 10x microscopic field (n=10-  
577 20). \*\*\*p<0.001, one-way ANOVA with Tukey's multiple comparison test.

578

579 **Figure 5. Enrichment of canonical splicing pattern at fusion junctions is associated with aberrant**  
580 **spliceosome activity in high-risk neuroblastoma.**

581 (a) Plot of the frequency versus the distance from 5' to 3' in the intrachromosomal fusion transcript  
582 identified in the NB discovery cohort (NB172); each dot represents a unique fusion transcript; fusion  
583 transcripts re-identified in the NB validation cohort (NB-v) were marked as red.

584 (b) Distribution of unique intrachromosomal vs interchromosomal fusion junctions flanked by GT\_AG  
585 or other nucleotide motifs in neuroblastoma, rhabdoid tumor, osteosarcoma and normal adrenal  
586 gland.

587 (c) Differential expression of genes in the KEGG Spliceosome pathway between neuroblastoma dataset  
588 (NBL172) versus human normal adrenal gland dataset.

589 (d) K-means analysis of the 498-SEQC dataset, utilizing the genes in the KEGG spliceosome pathway,  
590 generates two clusters with significant differences in Risk, INSS and *MYCN*-amplification.

591 (e) Overall survival probability of the two clusters identified in (d).

592

593 **Figure 6. Pharmaceutical inhibition of spliceosome activity reduces generation of fusion transcripts**  
594 **and induction of apoptosis in neuroblastoma cells.**

595 (a-b) Splicing-dependent generation of several high frequent fusion transcripts in LAN-1 (a) and SK-N-  
596 BE(1) (b) neuroblastoma cells. SK-N-BE(1) and LAN1 cells were treated with splicing inhibitor  
597 Pladienolide B at 100 nM (SK-N-BE(1)) and 5-50 nM (LAN-1) for 6 hours; RNA was isolated from  
598 harvested cells and reversely transcribed to cDNA; RT-PCR were performed with primers spanning the  
599 fusion junctions (fusion transcript) or exon-exon boundary (wild-type cognate).

600 (c) Induction of apoptosis in LAN-1 and SK-N-BE(1) cells, but not in human normal diploid fibroblasts  
601 (HDNF) upon pladienolide B treatment (0-20 nM) for 48 hours, as detected by western blotting of full-  
602 length CASPASE-3, cleaved CASPASE-3, full-length PARP and cleaved PARP;  $\beta$ -ACTIN was used as a  
603 loading control.

604

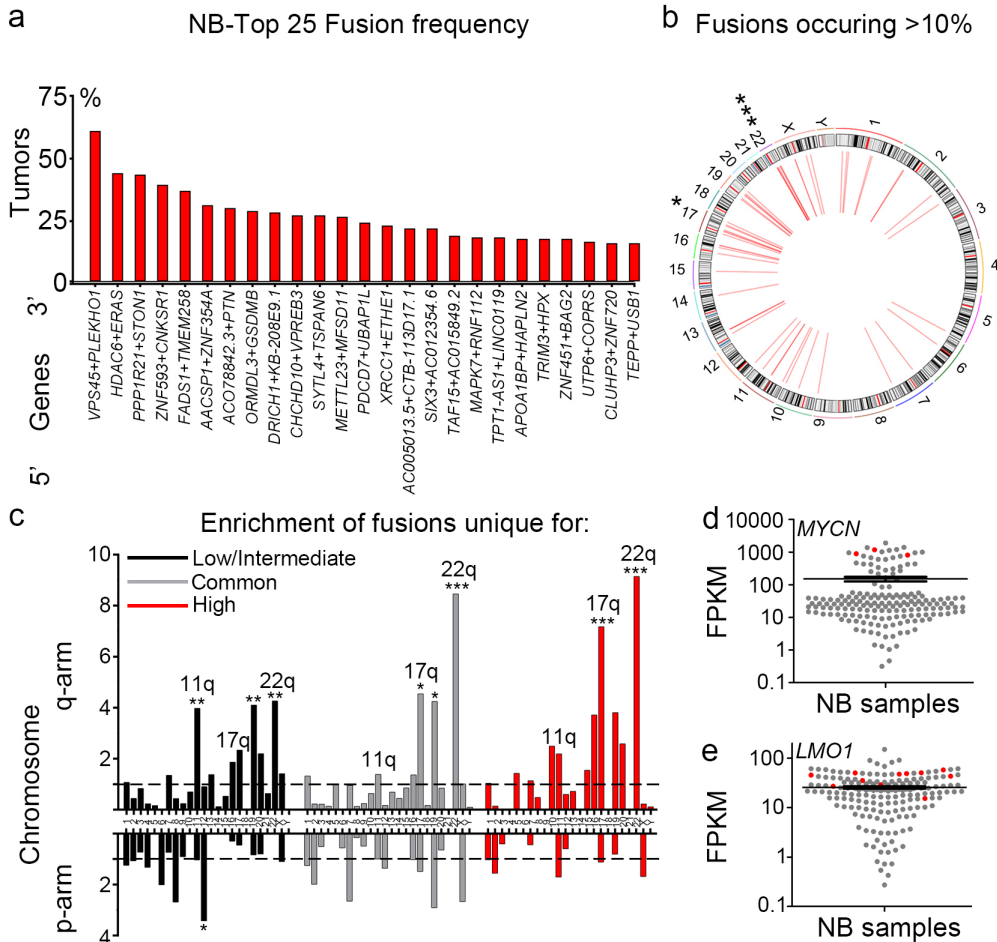



Figure 2

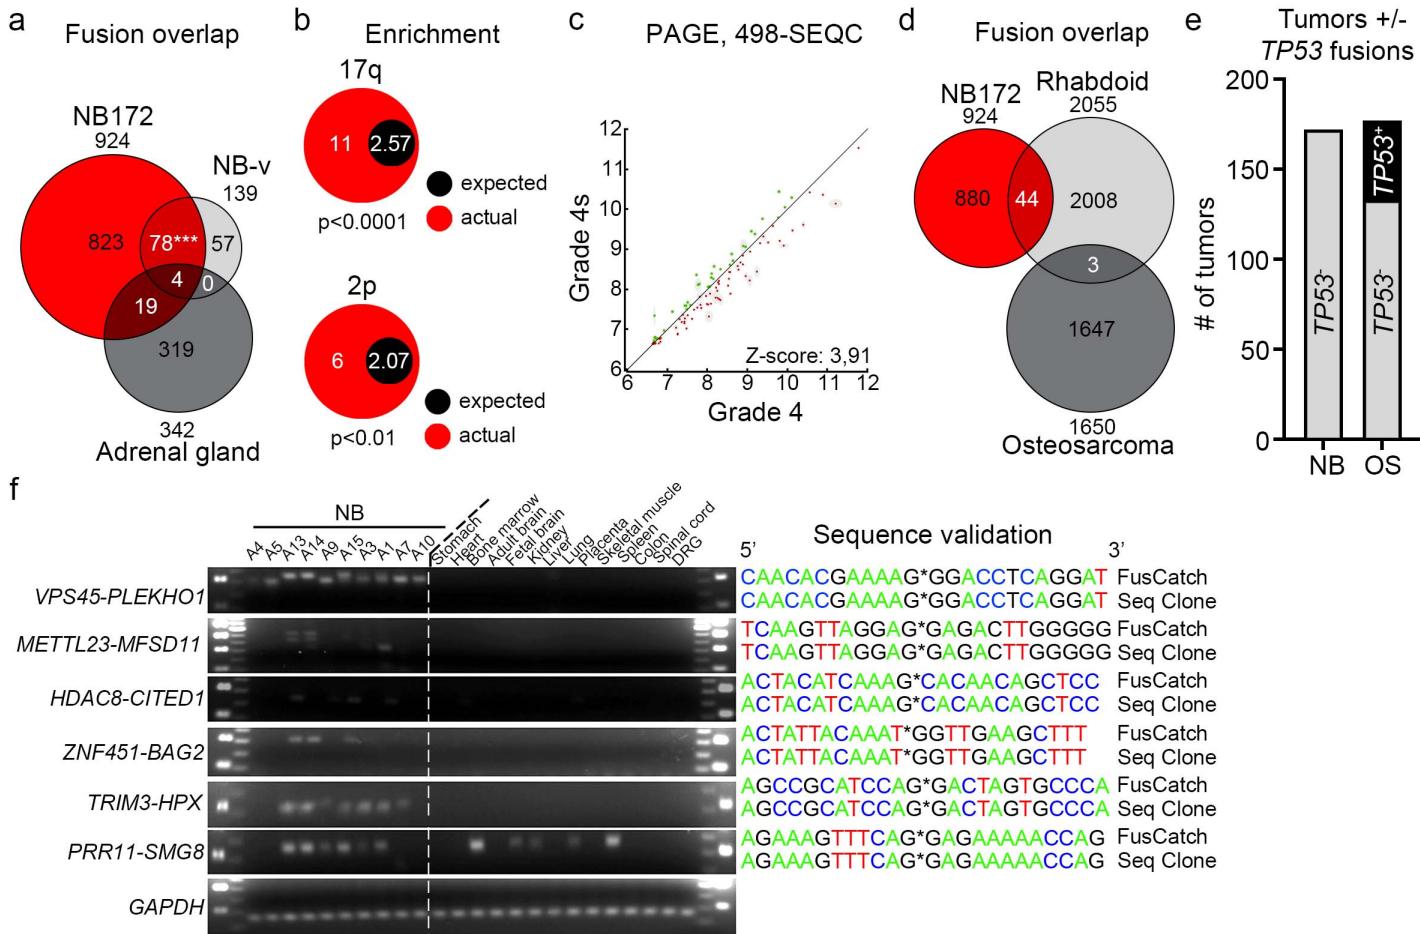



# Figure 3

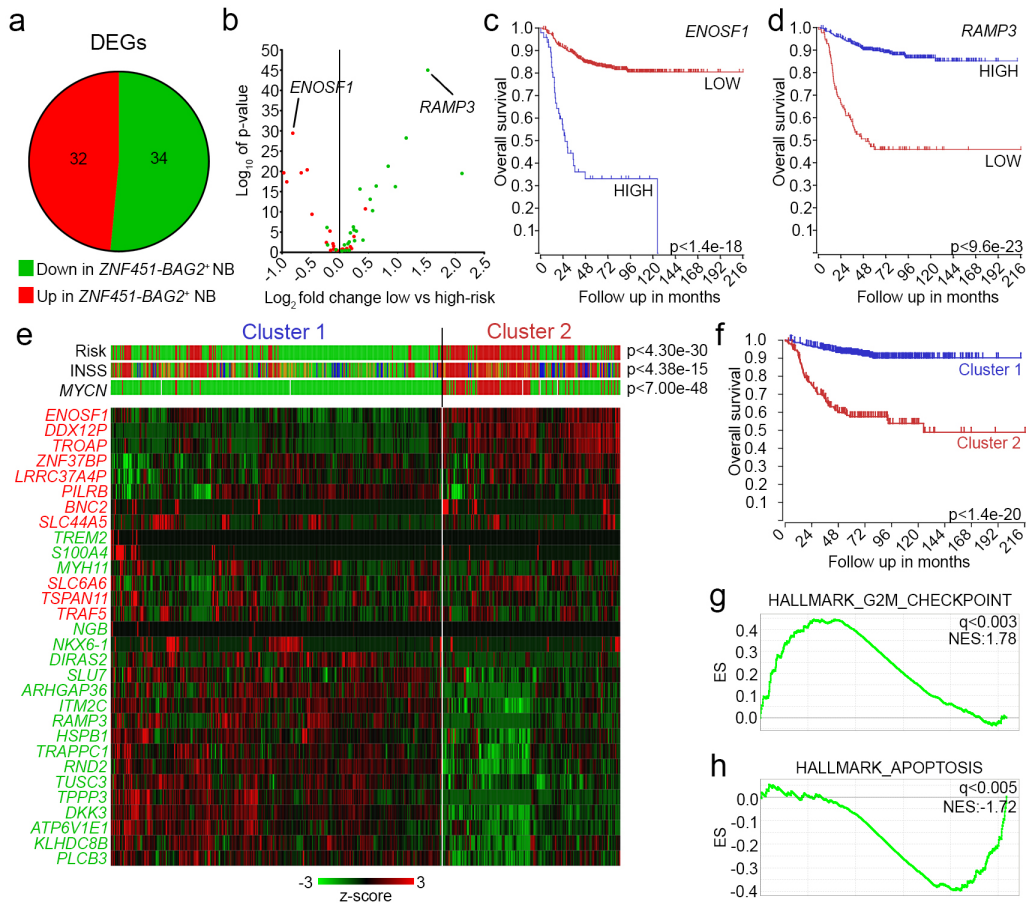

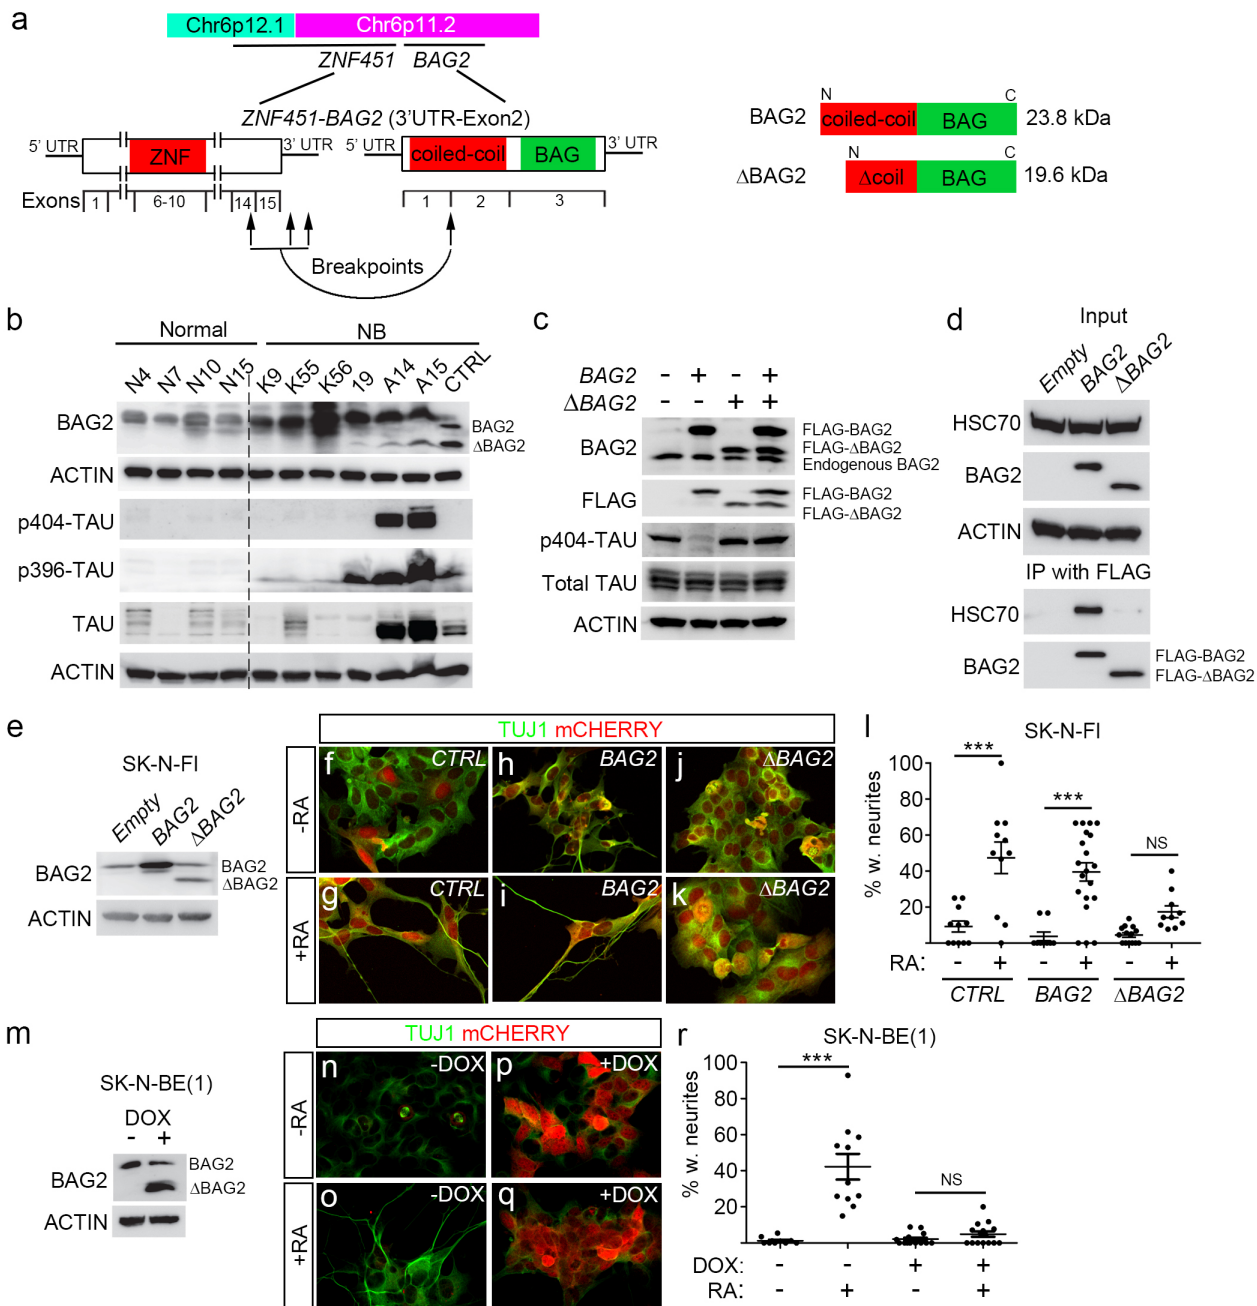

Figure 5

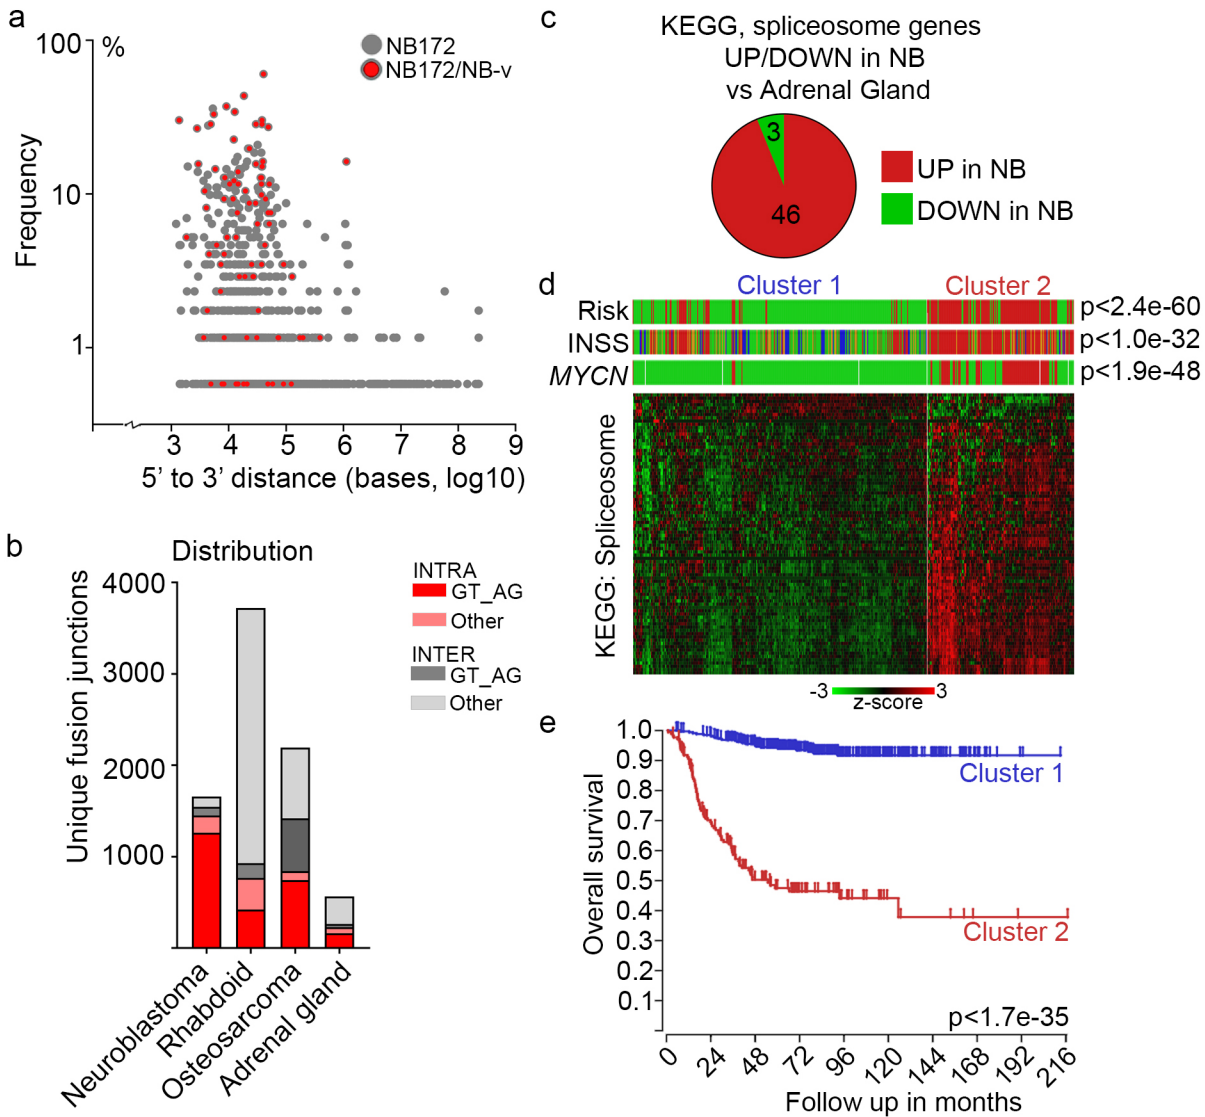

Figure 6

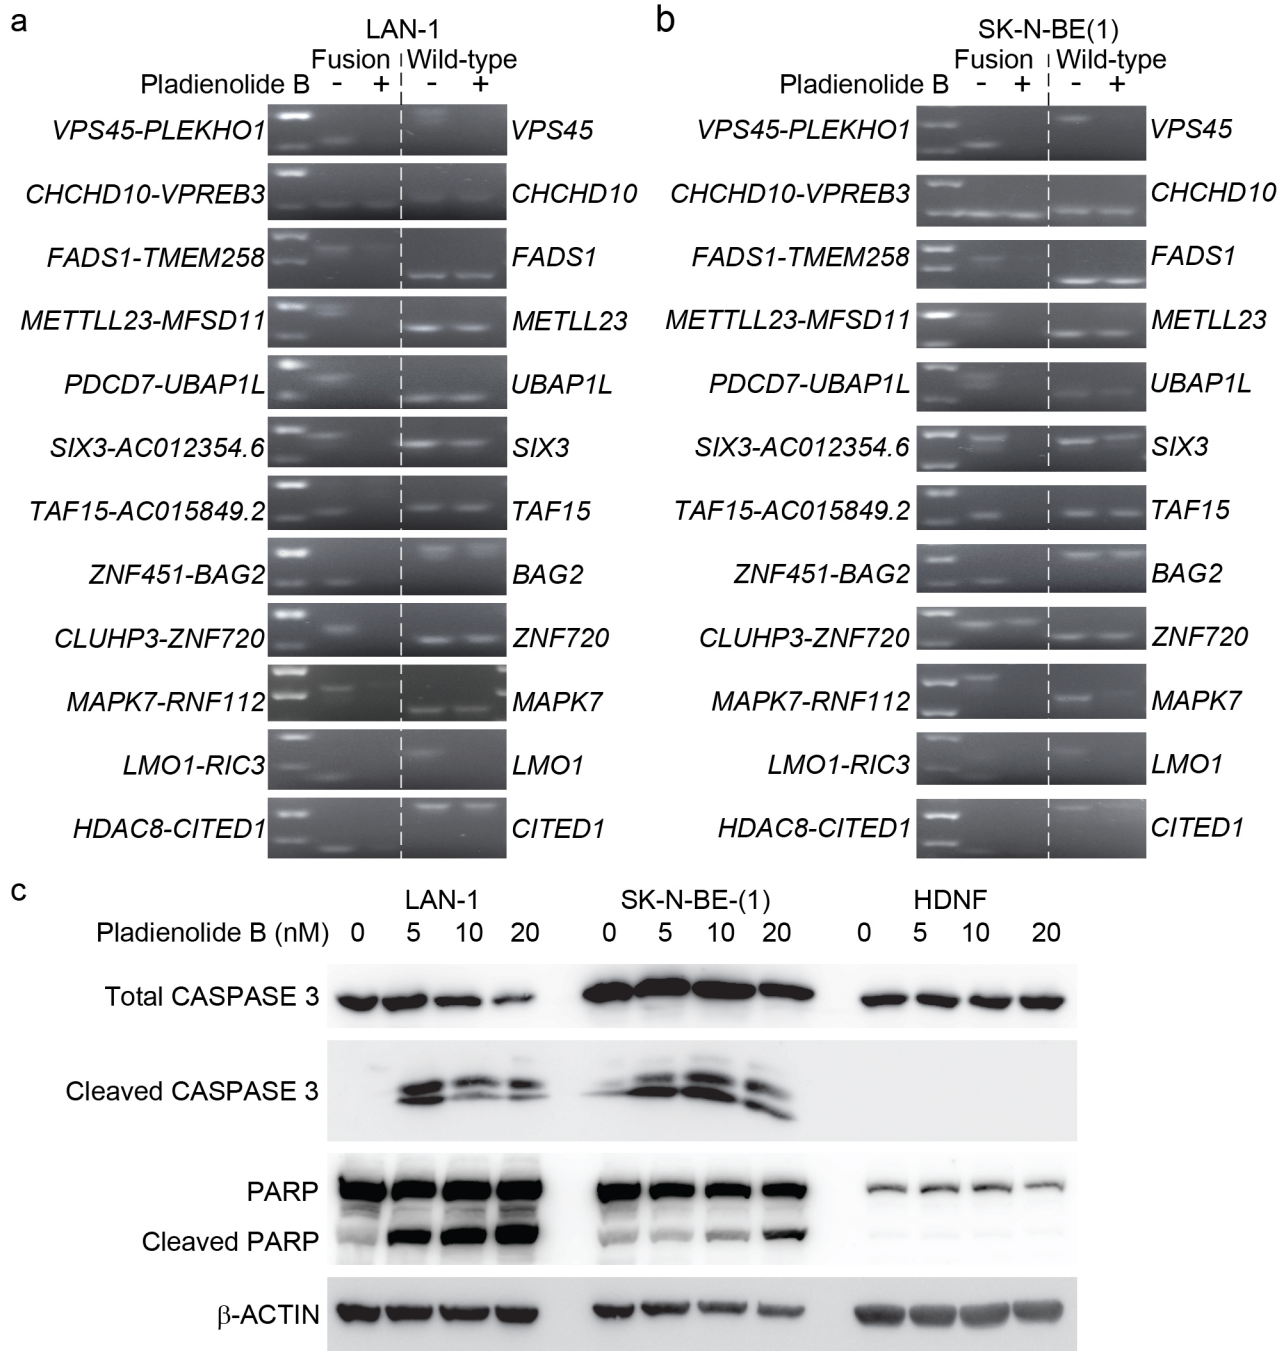

Source: https://www.biorxiv.org/content/10.1101/851238v1.full.pdf
